# Supplementary material for: An Indel Polymorphism in the MtnA 3' Untranslated Region Is Associated with Gene Expression Variation and Local Adaptation in Drosophila melanogaster
Source: PubMed Central journal article supplement (PMC4847869; doi:10.1371/journal.pgen.1005987), 2016-04-27
Supplement: pgen.1005987.s009.pdf [file pgen.1005987.s009.pdf]

**S6 Table.** Oxidative stress tolerance glm coefficients for *Mtn*Aknockdown and control lines

|                      | <b>Estimate</b> | <b>Std. Error</b> | <b>t value</b> | <b>P-value</b> |
|----------------------|-----------------|-------------------|----------------|----------------|
| <b>Intercept</b>     | -5.55789        | 0.53808           | -10.329        | 2.00E-16       |
| <b>Concentration</b> | 0.42612         | 0.04458           | 9.559          | 4.99E-15       |
| <b>Line</b>          | 2.08414         | 0.33802           | 6.166 2        | 4.30E-09       |
| <b>sex male</b>      | 1.54003         | 0.30396           | 5.067          | 2.41E-06       |
