# Supplementary material for: An Indel Polymorphism in the MtnA 3' Untranslated Region Is Associated with Gene Expression Variation and Local Adaptation in Drosophila melanogaster
Source: PubMed Central journal article supplement (PMC4847869; doi:10.1371/journal.pgen.1005987), 2016-04-27
Supplement: pgen.1005987.s011.pdf [file pgen.1005987.s011.pdf]

**S8 Table.** Male oxidative stress tolerance glm coefficients for the Dutch population

|                         | <b>Estimate</b> | <b>Std. Error</b> | <b>t value</b> | <b>P-value</b> |
|-------------------------|-----------------|-------------------|----------------|----------------|
| <b>Intercept</b>        | 2.537163        | 0.62857           | 4.036          | 2.31E-04       |
| <b>Concentration</b>    | -0.477495       | 0.085953          | -5.555         | 1.85E-06       |
| <b>Deletion present</b> | 1.162638        | 0.664607          | 1.749          | 0.087711       |
| <b>Line NL17</b>        | 0.003915        | 0.649791          | 0.006          | 0.995222       |
