# Supplementary material for: An Indel Polymorphism in the MtnA 3' Untranslated Region Is Associated with Gene Expression Variation and Local Adaptation in Drosophila melanogaster
Source: PubMed Central journal article supplement (PMC4847869; doi:10.1371/journal.pgen.1005987), 2016-04-27
Supplement: pgen.1005987.s012.pdf [file pgen.1005987.s012.pdf]

**S9 Table.** Male oxidative stress tolerance glm coefficients for *MtnA* knockdown and control lines

|                      | <b>Estimate</b> | <b>Std. Error</b> | <b>t value</b> | <b>P-value</b> |
|----------------------|-----------------|-------------------|----------------|----------------|
| <b>Intercept</b>     | -5.1622         | 0.8194            | -6.3           | 2.21E-07       |
| <b>Concentration</b> | 0.5323          | 0.0824            | 6.46           | 1.34E-07       |
| <b>Line</b>          | 2.9362          | 0.6192            | 4.742          | 2.96E-05       |
