# Supplementary material for: An Indel Polymorphism in the MtnA 3' Untranslated Region Is Associated with Gene Expression Variation and Local Adaptation in Drosophila melanogaster
Source: PubMed Central journal article supplement (PMC4847869; doi:10.1371/journal.pgen.1005987), 2016-04-27
Supplement: pgen.1005987.s013.pdf [file pgen.1005987.s013.pdf]

**S10 Table.** Female oxidative stress tolerance glm coefficients for the Malaysian population

|                         | <b>Estimate</b> | <b>Std. Error</b> | <b>t value</b> | <b>P-value</b> |
|-------------------------|-----------------|-------------------|----------------|----------------|
| <b>Intercept</b>        | 3.59488         | 0.61971           | 5.801          | 1.82E-07       |
| <b>Concentration</b>    | -0.28988        | 0.05879           | -4.931         | 5.42E-06       |
| <b>Deletion present</b> | 2.73793         | 1.27415           | 2.149          | 0.03516        |
| <b>Line KL02</b>        | -0.30477        | 0.56493           | -0.539         | 0.59129        |
| <b>Line KL10</b>        | -3.51212        | 1.25831           | -2.791         | 6.79E-03       |
| <b>Line KL11</b>        | -2.7662         | 1.27759           | -2.165         | 0.03384        |
