# Supplementary material for: An Indel Polymorphism in the MtnA 3' Untranslated Region Is Associated with Gene Expression Variation and Local Adaptation in Drosophila melanogaster
Source: PubMed Central journal article supplement (PMC4847869; doi:10.1371/journal.pgen.1005987), 2016-04-27
Supplement: pgen.1005987.s014.pdf [file pgen.1005987.s014.pdf]

**S11 Table.** Female oxidative stress tolerance glm coefficients for the Dutch population

|                         | <b>Estimate</b> | <b>Std. Error</b> | <b>t value</b> | <b>P-value</b> |
|-------------------------|-----------------|-------------------|----------------|----------------|
| <b>Intercept</b>        | 3.00525         | 0.68272           | 4.402          | 7.78E-05       |
| <b>Concentration</b>    | -0.45054        | 0.08932           | -5.044         | 1.03E-05       |
| <b>Deletion present</b> | 2.03235         | 0.62754           | 3.239          | 0.00242        |
| <b>Line NL17</b>        | -0.16871        | 0.62394           | -0.27          | 0.78824        |
