# Supplementary material for: An Indel Polymorphism in the MtnA 3' Untranslated Region Is Associated with Gene Expression Variation and Local Adaptation in Drosophila melanogaster
Source: PLOS journal article supplement (doi:10.1371/journal.pgen.1005987), 2016-04-27
Supplement: S1 (10.1371/journal.pgen.1005987.s001) [file journal.pgen.1005987.s001]

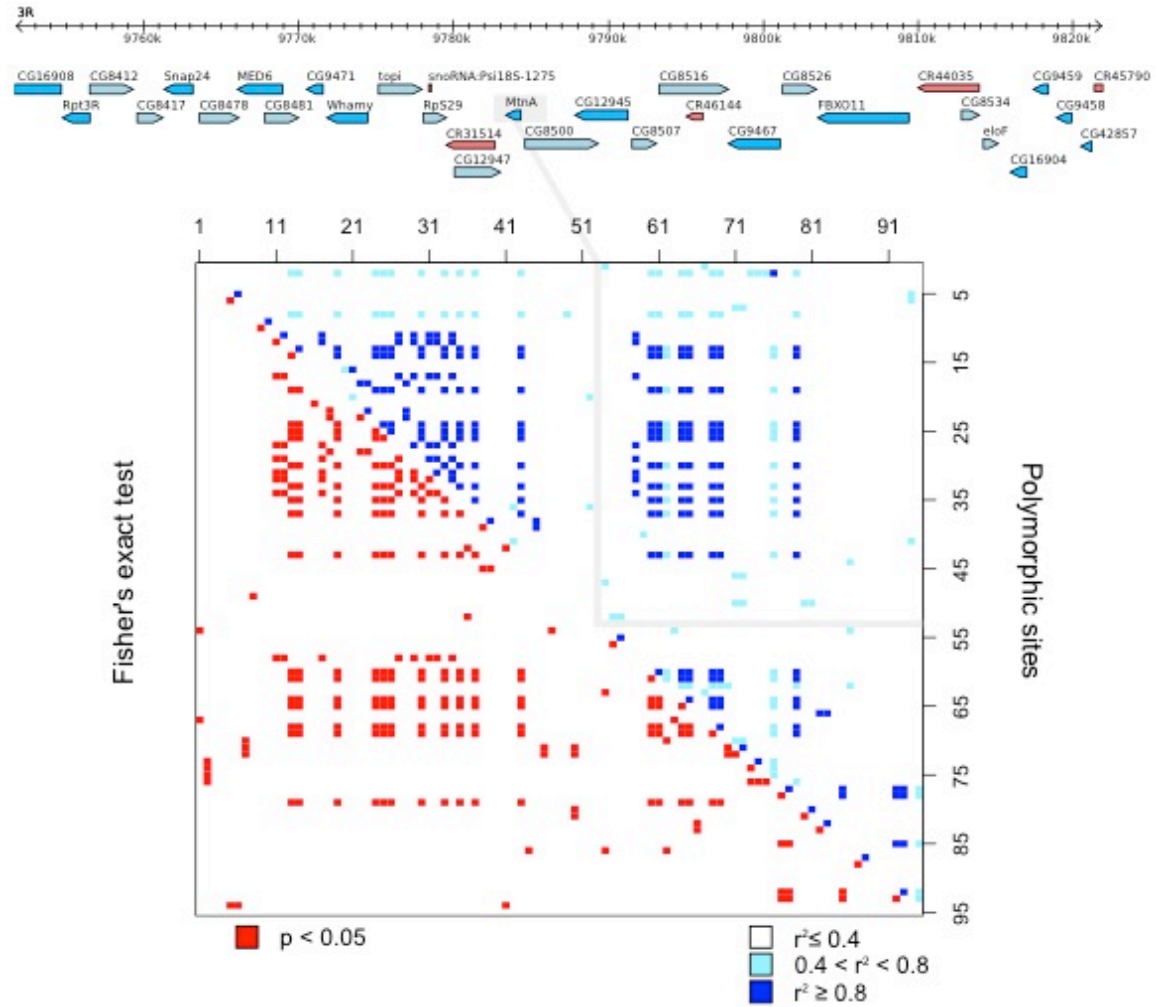

**S1 Fig. Linkage disequilibrium matrix.** Linkage disequilibrium was assed from a genomic region of 100 kb with *MtnA* at the center. The upper and right axes show the SNPs found in the 100 kb fragment not taking into account singletons and each bin represent  $r^2$  values. The left and bottom part of the matrix show the Fisher exact test for each of the  $r^2$  values. Red boxes indicate significant p-values.
